# Supplementary material
Source: Springer Nature journal article supplement (https://www.springermedizin.de/resource/supplementary/12990_2010_365_MOESM3_ESM.pdf/9613276)

**(A) Western blot (Day 5)**

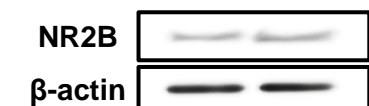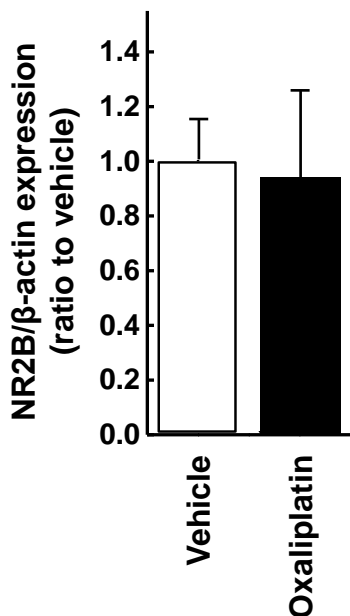

**(B) PCR (Day 5)**

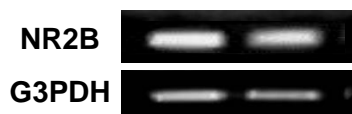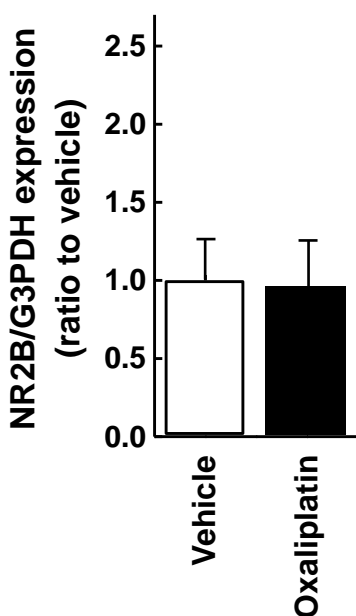

**(C) Western blot (Day 25)**

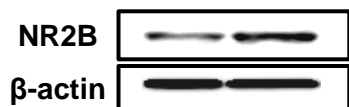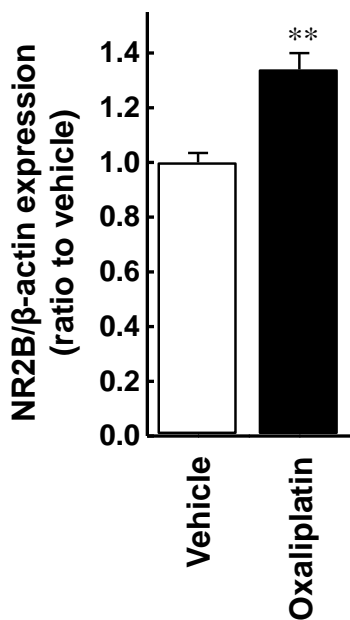

**(D) PCR (Day 25)**

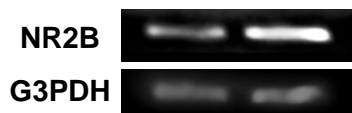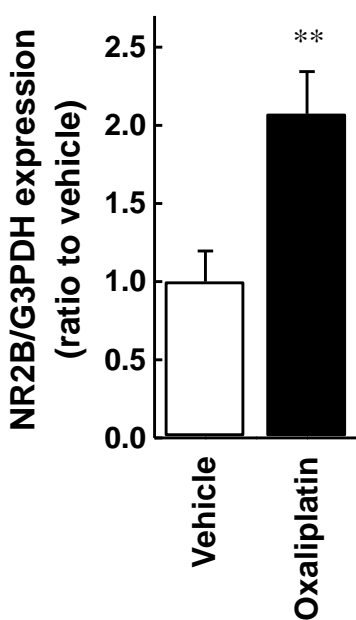

Supplement: MOESM3 [file 9613276]
